# Supplementary material
Source: publisher figshare collection journal article supplement (https://diabetesjournals.figshare.com/articles/dataset/_/27244935)
Supplement: Supplementary file 1 [file 1]

### **SUPPLEMENTAL FIGURE LEGEND**

Supplemental Figure 1. A representative cardiac PET image is shown. LV = left ventricle;  
RV = right ventricle; SVC = superior vena cava; Li = Liver
